# Supplementary material for: Nr0b1 is a negative regulator of Zscan4c in mouse embryonic stem cells
Source: PubMed Central journal article supplement (PMC5390923; doi:10.1038/srep09146), 2015-03-16
Supplement: srep09146-s1.pdf [file srep09146-s1.pdf]

## **Supplementary information**

### **Nr0b1 is a negative regulator of *Zscan4c* in mouse embryonic stem cells**

Setsuko Fujii, Satomi Nishikawa-Torikai, Yoko Futatsugi, Yayoi Toyooka, Mariko

Yamane, Satoshi Ohtsuka and Hitoshi Niwa

## Legends for supplemental data

**Supplemental Figure 1.** (related to Fig. 1) Western blot analysis of Nr0b1 expression in wild-type (+/Y), *Nr0b1<sup>fl/Y</sup>* (fl/Y) and *Nr0b1<sup>KO/Y</sup>* (KO/Y) ES cells. Data from two independent *Nr0b1<sup>fl/Y</sup>* (fl/Y) ES cell lines were shown and left set was shown in Fig 1d.

**Supplemental Figure 2.** (related to Fig. 4) Immunostaining of *Nr0b1<sup>KO/Y</sup>* ES cells by antibodies against Gata4 (C-20, Santa Cruz), Sox7 (R&D) and Sox17 (R&D); left: bright field, center: Hoechst staining, right: antibody staining detected by Alexa 594.

**Supplemental Figure 3.** (related to Fig. 4) Immunostaining by anti-Tcstv1 antibody.

(a) Immunostaining of mouse pre-implantation embryos; green: Tcstv1, red: Oct3/4. (b)

Immunostaining of OCRG9 ES cells; red: Tcstv1, green: Rex1Egfp, cyan: Oct3/4Ecfp, blue: Hoechst staining.

**Supplemental Figure 4.** (related to Fig. 7) Western blot analysis of Nr0b1 expression in wild-type (+/Y), *Nr0b1<sup>fl/Y</sup>* (fl/Y) *Nr0b1<sup>KO/Y</sup>* (KO/Y) ES cells, and Tg ES cells cultured with or without Dox. CDK2 acts as a control.

**Supplemental Figure 5.** Generation and analysis of inducible *Nr5a2*-null ES cells. (a)

Schematic representation of the strategy to generate the inducible *Nr5a2*-null ES cells.

(b) Colony morphologies of *Nr5a2<sup>fl/fl</sup>* ES cells carrying hormone inducible Cre after the culture for 5 days without (upper panel) or with Tx (lower panel). Scale bar; 200  $\mu$ m.

(c) Quantitative RT-PCR analysis of inducible *Nr5a2*-null ES cells cultured with or without Tx for 5 days. The expressions of pluripotency-associated genes (upper panel) and 2-cell specific transcript genes (lower panel) are indicated. The expression levels of each transcript in inducible *Nr5a2*-null ES cells without Tx was set at 1.0. Error bars indicate standard deviation (n=3).

**Supplemental Table 1.** List of the primer sequence

**Supplemental Table 2.** Efficiency of the production of chimeric embryos from *Nr0b1<sup>fl/Y</sup>* and *Nr0b1<sup>KO/Y</sup>* ES cells carrying *pPBCAG-Egfp-IP*. Embryos carrying GFP-positive cells were designated as chimeras.

**Supplemental Movie 1.** Live-imaging of the fluorescent signal of *Nr0b1<sup>fl/Y</sup>* and *Nr0b1<sup>KO/Y</sup>* ES cells carrying *pPB-Zscan4c-mCherry*.

Supplemental Fig 1

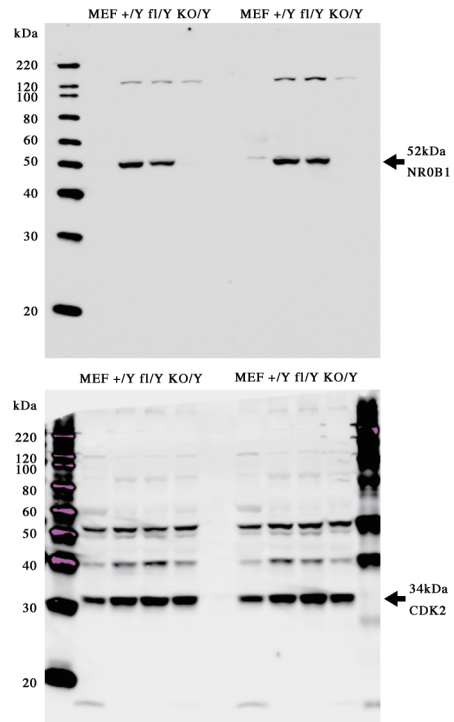

Supplemental Fig 2

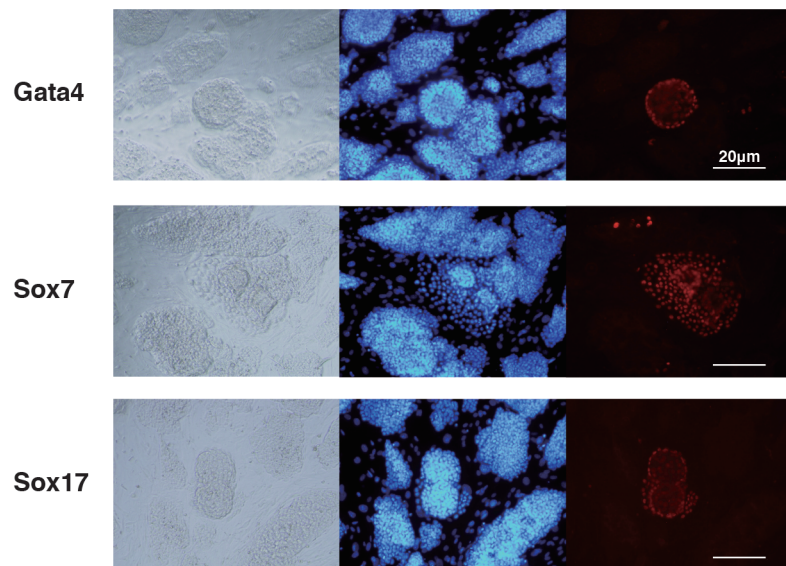

Supplemental Fig 3

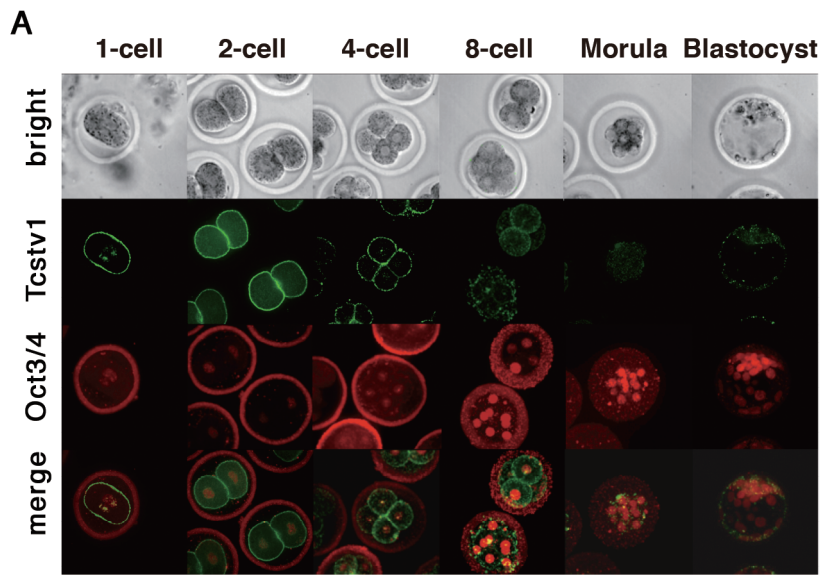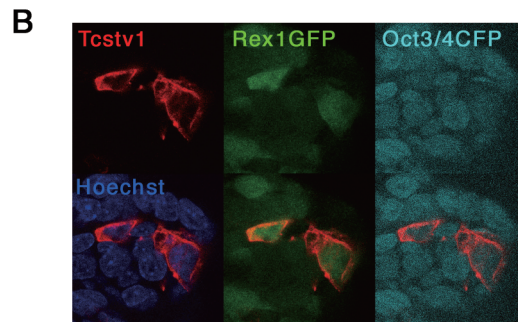

## Supplemental Fig 4

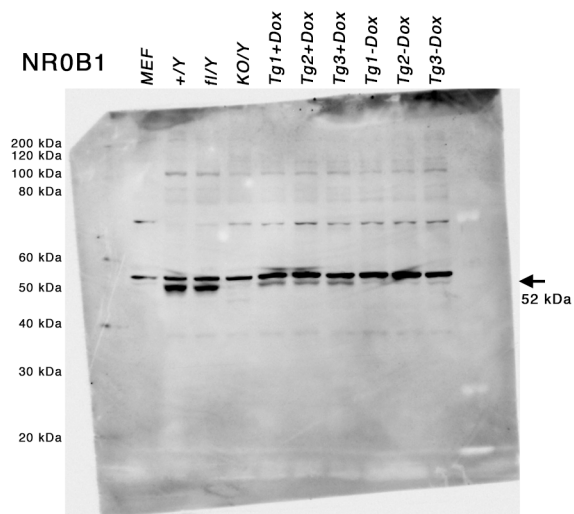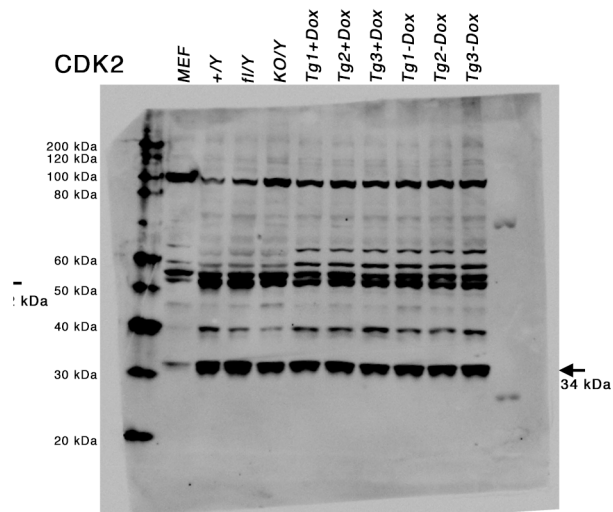

## Supplemental Fig 5

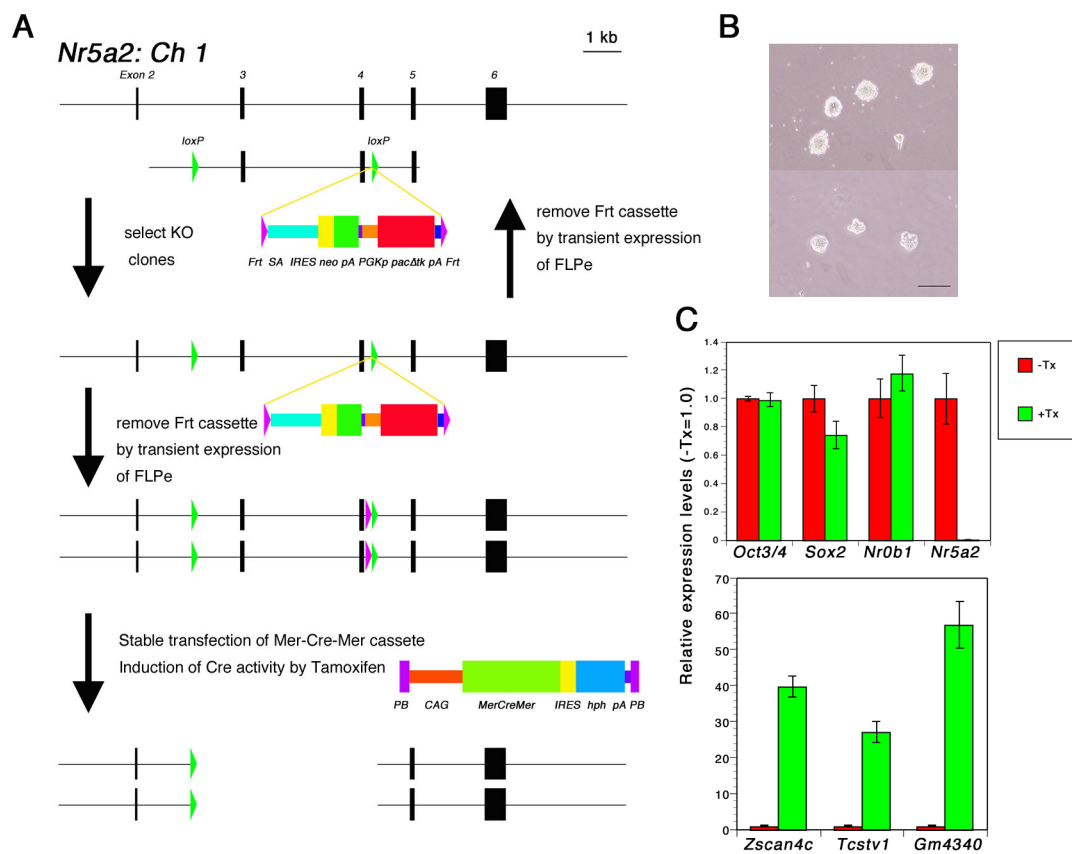



**Table S1.** List of primer sequence.

For plasmid construction

| Target gene                  | Forward primer                                                  | Reverse primer                                                     |
|------------------------------|-----------------------------------------------------------------|--------------------------------------------------------------------|
| <i>Nr0b1</i><br>(5' arm)     | 5'-gctcgacggtatcgatactcacact<br>cagatagcttgtagc -3'             | 5'-taatgtatgctatacgaagtatatggac<br>tgaaataagttctaagtttcagaagca -3' |
| <i>Nr0b1</i><br>(flox)       | 5'-cgtatagcatacattatacgaagtta<br>ttatttaggcccccagaaaacccttt -3' | 5'-gtataatgtatgctatacgaagtatattc<br>acataaagatgtttaaactctgttgag-3' |
| <i>Nr0b1</i><br>(3' arm)     | 5'-tgaagatctccttagaagcctggg<br>aatc -3'                         | 5'-aatgcgccgctgatgaattcatccac<br>attctgcct -3'                     |
| <i>Nr0b1</i><br>(KO PCR 1)   | 5'-gcgacggtgacgaaggccagcaa<br>ttagg -3'                         | 5'-cggaataggaactcagatctcgatcta<br>ta -3'                           |
| <i>Nr0b1</i><br>(KO PCR 2)   | 5'-aagtgttgcttctgaaaacttagaac<br>ttattcagtcctataaactcgt -3'     | 5'-tgcactcacatgcacagacacacaca<br>cacg -3'                          |
| <i>Zscan4c</i><br>(promoter) | 5'-attgtcgacaccttctgttcatgcaag<br>cctgg -3'                     | 5'-aataccgggtctcgagtgggacaatgg<br>gtgaaagattc -3'                  |
| <i>Zscan4c</i><br>(CDS)      | 5'-attctcgagtcaccacaatggcttca<br>cagcaggca -3'                  | 5'-aatgcgcccgcttcagtcagatctgtg<br>gtaattcctc -3'                   |
| <i>Nr0b1</i><br>(CDS)        | 5'-ccctcgagcctcaggccatggcgg<br>gtgaggaccaccgt -3'               | 5'-ccgcccggctcacagcttgcacaga<br>acatc -3'                          |

For QPCR

| Target gene   | Forward primer                      | Reverse primer                   |
|---------------|-------------------------------------|----------------------------------|
| <i>Gapdh</i>  | 5'-tgccatcactgccaccagaagactg<br>-3' | 5'-tgaggccaccaccctgttgctgtag -3' |
| <i>Oct3/4</i> | 5'- aagccctccctacagcagat -3'        | 5'- ctgggaaagggtgccctgta -3'     |
| <i>Nr0b1</i>  | 5'- tccaggccatcaagagtttc -3'        | 5'- atctgctgggttctccactg -3'     |
| <i>Sox2</i>   | 5'- gagtggaactttgtccgaga -3'        | 5'- gaagcgtgtacttatccttctcat -3' |
| <i>Nanog</i>  | 5'-acctgagctataagcaggtaagac<br>-3'  | 5'- gtgctgagcccttctgaatcagac -3' |
| <i>Tbx3</i>   | 5'- tcccggaaacagaattcatc -3'        | 5'- gagacagcaggagaggatgc -3'     |

|                |                              |                               |
|----------------|------------------------------|-------------------------------|
| <i>Klf2</i>    | 5'- accaagagctcgcacctaaa -3' | 5'- gtggcactgaaagggctctgt -3' |
| <i>Klf4</i>    | 5'- ccaaagaggggaagaaggtc -3' | 5'- cctgtgtgtttgcggtagtg -3'  |
| <i>Klf5</i>    | 5'-caagccgttccagtgcat-3'     | 5'-gtctgcggtttaaggatgg-3'     |
| <i>Esrrb</i>   | 5'-ctcgccaactcagattcgat-3'   | 5'-agaagtgtgcacggcttg-3'      |
| <i>Zscan4c</i> | 5'-ccggagaaagcagtgaggtgga-3' | 5'-cgaaaatgctaacagttgat-3'    |
| <i>Tcstv1</i>  | 5'-tcccaggagatgtggaaa-3'     | 5'-cgtcacaggtcacaagatccaga-3' |
| <i>Gm4340</i>  | 5'-tggacttcattcacagcttc-3'   | 5'-catggaatttggccttgatc-3'    |
| <i>Nr5a2</i>   | 5'-agatgccagaaaacatgcaa-3'   | 5'-tatcgccacacacaggacat-3'    |
| <i>ClnE1</i>   | 5'-ttctgcagcgtcatcctct-3'    | 5'-tggagcttatagacttcgcaca-3'  |

**Table S2.** Efficiency of the production of chimeric embryos.

| Cell line                         | Number of collected embryos | Number of chimeras |
|-----------------------------------|-----------------------------|--------------------|
| <i>Nr0b1<sup>Floxed/Y</sup> 1</i> | 7                           | 0                  |
| <i>Nr0b1<sup>Floxed/Y</sup> 2</i> | 12                          | 4                  |
| <i>Nr0b1<sup>Floxed/Y</sup> 3</i> | 4                           | 0                  |
| <i>Nr0b1<sup>Null/Y</sup> 1</i>   | 10                          | 1                  |
| <i>Nr0b1<sup>Null/Y</sup> 2</i>   | 6                           | 0                  |
| <i>Nr0b1<sup>Null/Y</sup> 3</i>   | 13                          | 1                  |
| <i>Nr0b1<sup>Null/Y</sup> 4</i>   | 6                           | 2                  |
